# Supplementary material for: The surfactant-free bottom-up synthesis of ultrathin MOF nanosheets for the oxidation of isoeugenol to vanillin
Source: Royal Society of Chemistry journal article supplement (doi:10.1039/d0ma00168f), 2020-01-01
Supplement: d0ma00168f1.pdf [file d0ma00168f1.pdf]

## Chemicals and Reagents

Cobalt (II) nitrate hexahydrate ( $\text{Co NO}_3 \cdot 6\text{H}_2\text{O}$ ) and Nickel (II) nitrate hexahydrate ( $\text{Ni NO}_3 \cdot 6\text{H}_2\text{O}$ ) was purchased from Sigma-Aldrich (China). 4,4'-Oxybis (benzoic acid) (98 %) by Aladdin. The deionized water used in our experiments was obtained from the Milli-Q System. Other analytical grade solvents including DMF, Ethanol, Methanol were supplied by Beijing Chemical Reagent Company (China). All the chemicals were used without further purification.

## General Characterization

Scanning electron microscopy (SEM) measurement was performed on a Hitachi SU8200 scanning electron microscope at 6.0 kV. Transmission electron microscopy (TEM) and high-resolution TEM (HRTEM) imaging and High angle annular dark field scanning transmission electron microscopy (HAADF-STEM) imaging were carried out using Tecnai G<sub>2</sub> F20 S-TWIN at 200 kV. The thickness of ultrathin sheets was measured by atomic force microscopy (AFM) by using a Bruker multimode-8 scanning probe microscope. Powder X-ray diffraction (XRD) patterns were recorded on D/MAX-TTRIII (CBO) with Cu K $\alpha$  radiation ( $\lambda = 1.542 \text{ \AA}$ ) operating at 40 kV and 300 mA. The specific surface area, pore volume and pore size of catalysts were measured using a BET (Brunauer-Emmett-Teller) instrument (ASAP 2420-4, Micromeritics).

### Synthesis of $\text{Co}(\text{Hoba})_2 \cdot 2\text{H}_2\text{O}$ at different temperature.

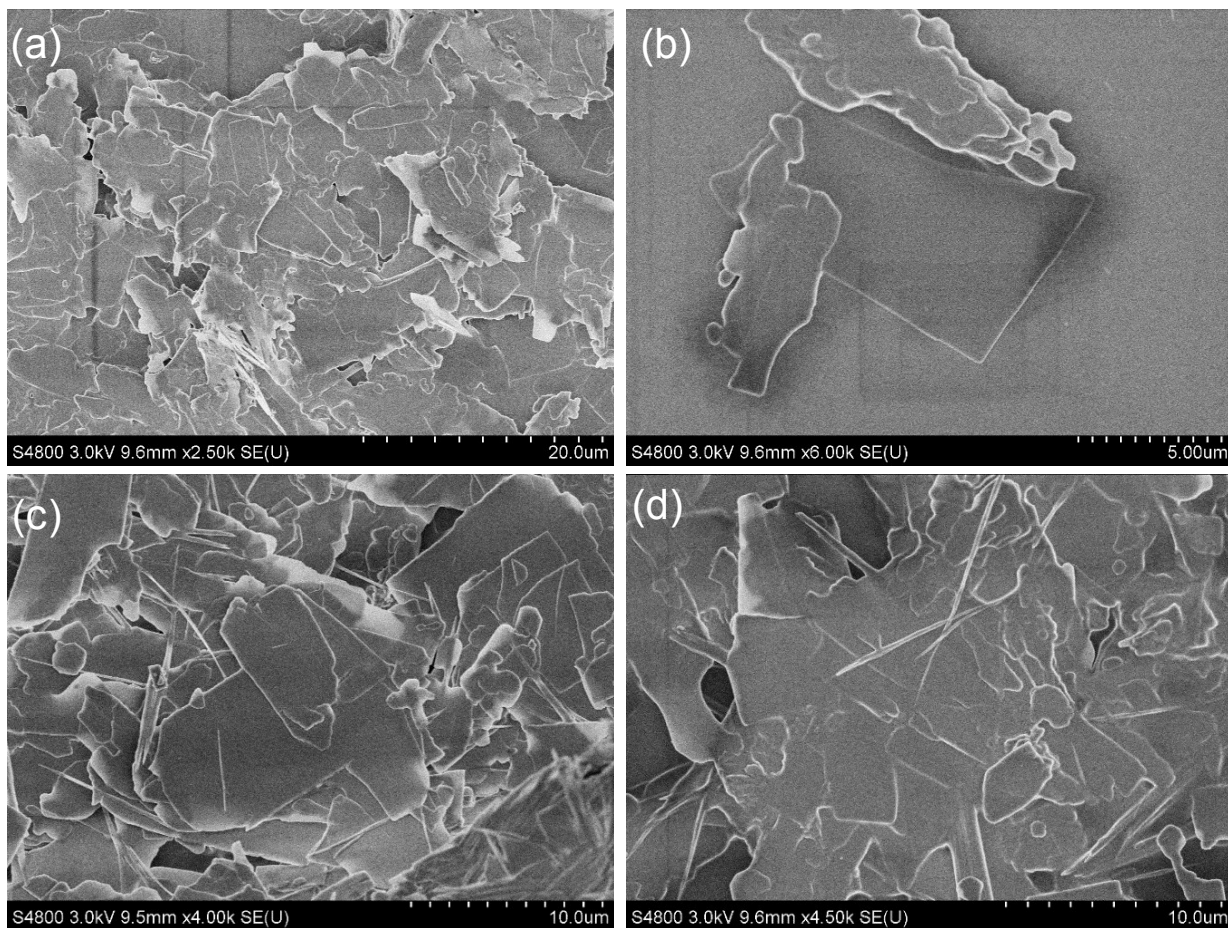

**Fig. S1:** SEM image shows  $\text{Co}(\text{Hoba})_2 \cdot 2\text{H}_2\text{O}$  at different temperature. (a) 120 °C, (b) 150 °C, (c) 160 °C, (d) 180 °C.

$\text{Co}(\text{NO}_3)_2 \cdot 6\text{H}_2\text{O}$  (0.4 mmol) and  $\text{H}_2\text{oba}$  (0.8 mmol) were mixed in 5 mL of distilled water, 20  $\mu\text{L}$  of TEA were added into the solution to adjust the pH value to  $\sim 7.00$ . Then the solution was kept in a 20 mL Teflon-lined stainless-steel autoclave heated at 120 or 150 or 180 °C for 12h, followed by cooling to room temperature. The products were centrifuged and washed with ethanol several times and finally dried at room temperature to collect the pink colored MOF with a 60% yield. From this different temperature screening analysis, we have found 120 °C is better for this MOF synthesis.

## Synthesis of $\text{Co}(\text{Hoba})_2 \cdot 2\text{H}_2\text{O}$ at different Time variation.

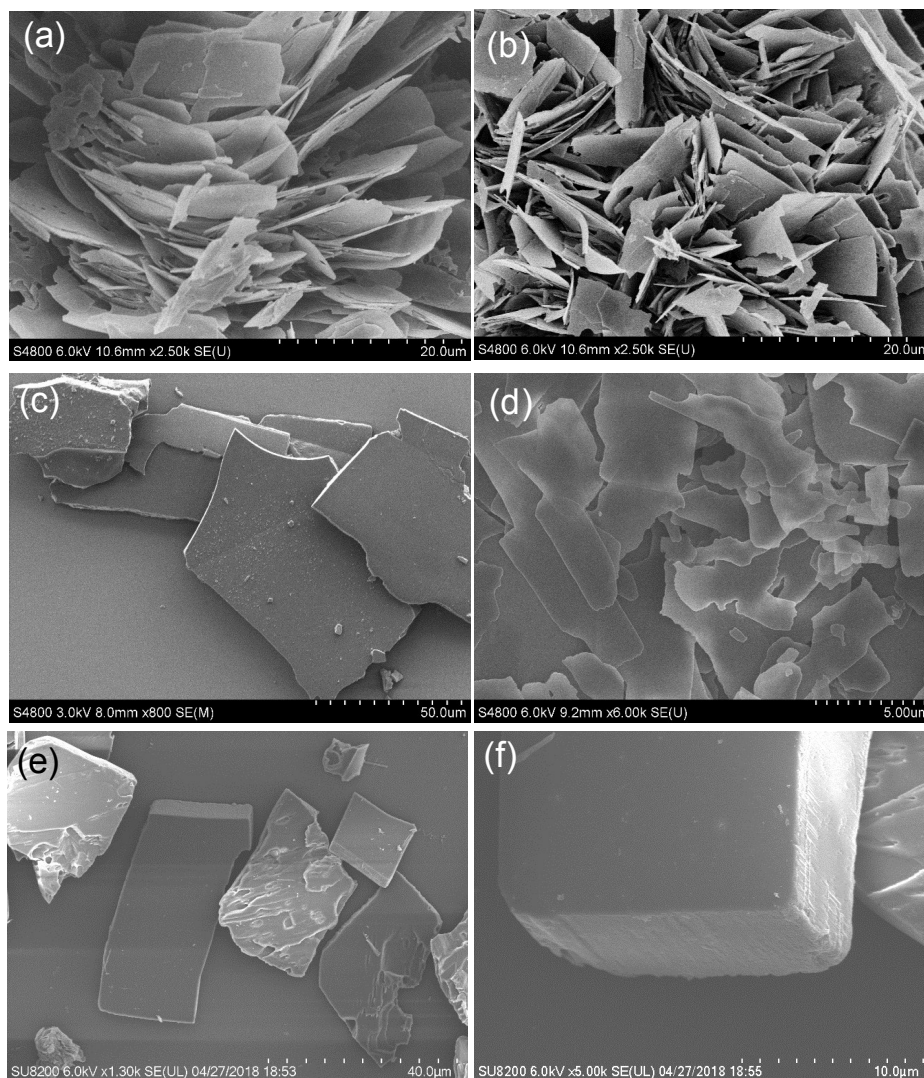

**Fig. S2:** SEM image shows  $\text{Co}(\text{Hoba})_2 \cdot 2\text{H}_2\text{O}$  at different time variation. (a) 6h, (b) 12h, (c) 24h, (d) 48h, (e) 62h, (f) 72h.

$\text{Co}(\text{NO}_3)_2 \cdot 6\text{H}_2\text{O}$  (0.4 mmol) and  $\text{H}_2\text{oba}$  (0.8 mmol) were mixed in 5 mL of distilled water, 20  $\mu\text{l}$  of TEA were added into the solution to adjust the pH value to  $\sim 7.00$ . Then the solution was kept in a 20 mL Teflon-lined stainless-steel autoclave heated at  $120^\circ\text{C}$  for 6, 12, 24, 48, 62, 72h, respectively, followed by cooling to room temperature. The products were centrifuged and washed with ethanol several times and finally dried at room temperature to collect the pink colored MOF with a 60% yield. From this different time screening analysis, we have found 6h to 12h is the ideal time for this MOF nanosheet synthesis.

### Synthesis of $\text{Co}(\text{Hoba})_2 \cdot 2\text{H}_2\text{O}$ at various solvents.

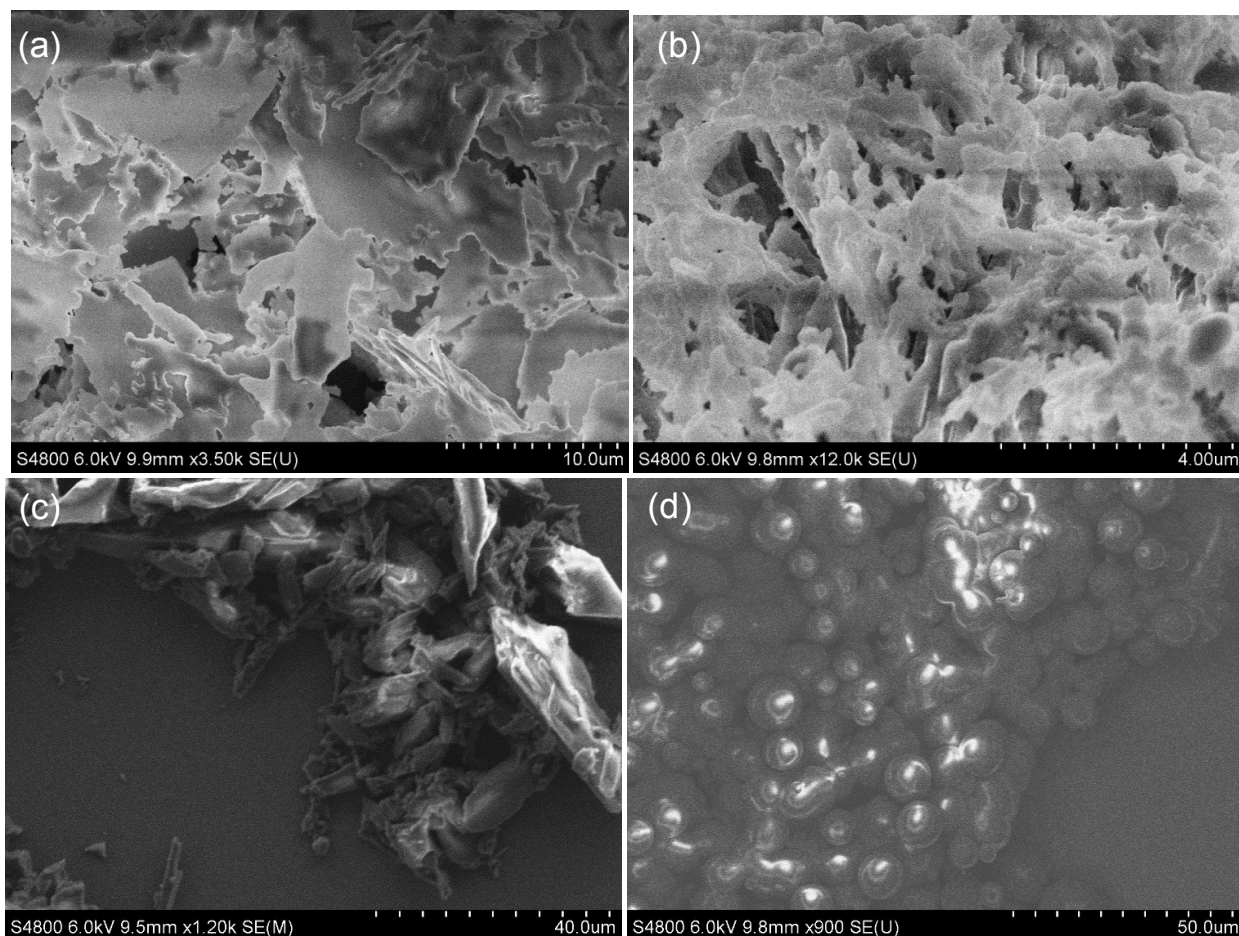

**Fig. S3:** SEM image shows  $\text{Co}(\text{Hoba})_2 \cdot 2\text{H}_2\text{O}$  at various solvents. (a) Ethanol, (b) Methanol, (c) DMF/H<sub>2</sub>O, (d) DMF.

$\text{Co}(\text{NO}_3)_2 \cdot 6\text{H}_2\text{O}$  (0.4 mmol) and  $\text{H}_2\text{oba}$  (0.8 mmol) were mixed in 5 mL of distilled water, or water/DMF or Ethanol or Methanol as a solvent. 20 $\mu\text{l}$  of TEA were added into the solution to adjust the pH value to  $\sim 7.00$ . Then the solution was kept in a 20 mL Teflon-lined stainless-steel autoclave heated at 120°C for 12h, followed by cooling to room temperature. The products were centrifuged and washed with ethanol several times and finally dried at room temperature to collect the pink colored MOF with a 60% yield. From this different solvent screening analysis, we have found that water is an ideal solvent to produce nanosheet for this MOF synthesis.

#### Synthesis of $\text{Co}(\text{Hoba})_2 \cdot 2\text{H}_2\text{O}$ without base (TEA).

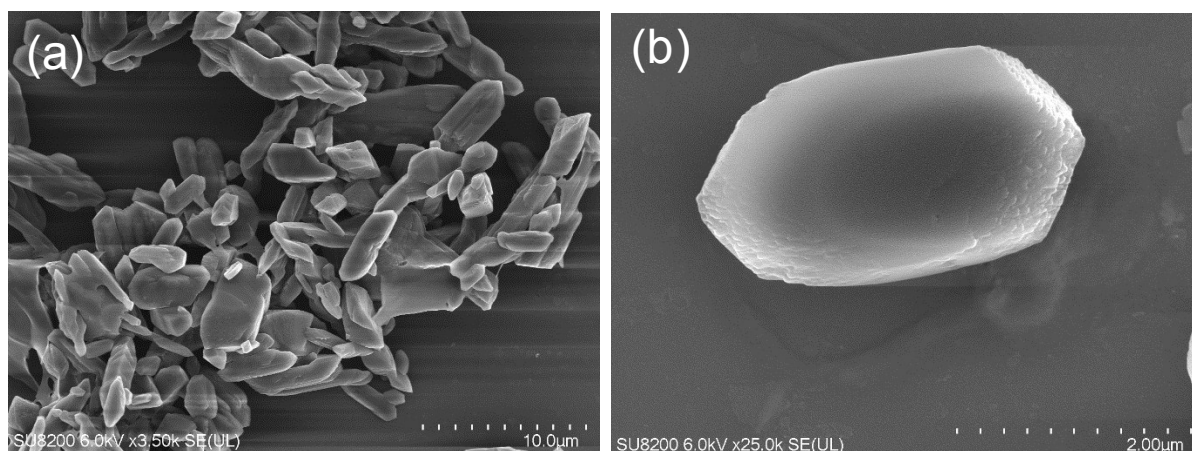

**Fig. S4:** SEM image (a, b) shows  $\text{Co}(\text{Hoba})_2 \cdot 2\text{H}_2\text{O}$  at without base.

$\text{Co}(\text{NO}_3)_2 \cdot 6\text{H}_2\text{O}$  (0.4 mmol) and  $\text{H}_2\text{oba}$  (0.8 mmol) were mixed in 5 mL of distilled water, as a solvent .without base Triethylamine. Then the solution was kept in a 20 mL Teflon-lined stainless-steel autoclave heated at 120°C for 12h, followed by cooling to room temperature. The products were centrifuged and washed with ethanol several times and finally dried at room temperature to collect the white colored reactant only. From this screening analysis, we have found that the base is playing a vital role in the synthesis of MOF formation.

#### Synthesis of $\text{Ni}(\text{Hoba})_2 \cdot 2\text{H}_2\text{O}$ without base (TEA).

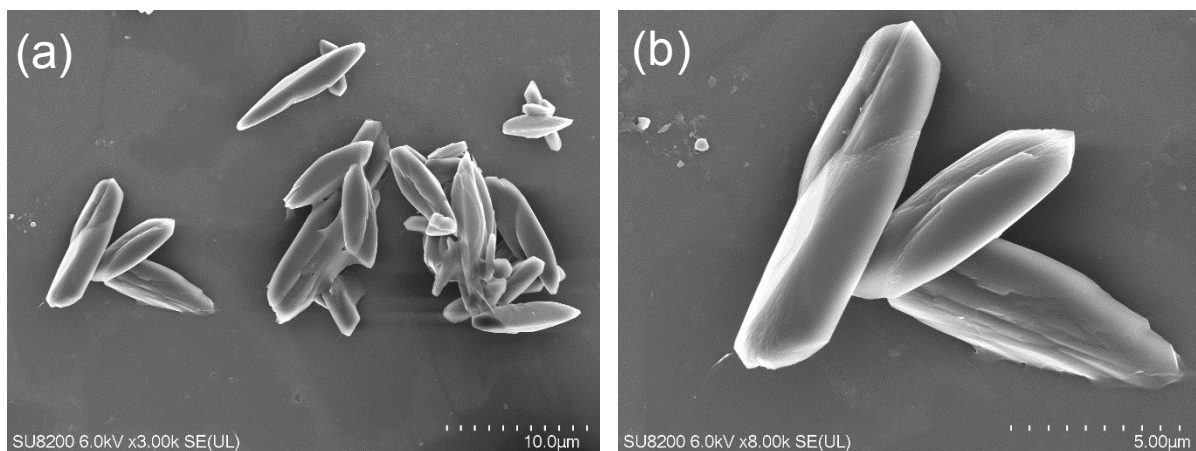

**Fig. S5:** SEM image (a, b) shows  $\text{Ni}(\text{Hoba})_2 \cdot 2\text{H}_2\text{O}$  at without base.

$\text{Ni}(\text{NO}_3)_2 \cdot 6\text{H}_2\text{O}$  (0.4 mmol) and  $\text{H}_2\text{oba}$  (0.8 mmol) were mixed in 5 mL of distilled water, as a solvent .without base Triethylamine. Then the solution was kept in a 20 mL Teflon-lined stainless-

steel autoclave heated at 120°C for 12h, followed by cooling to room temperature. The products were centrifuged and washed with ethanol several times and finally dried at room temperature to collect the white colored reactant only. From this screening analysis, we have found that the base is playing a vital role in the synthesis of MOF formation.

### Synthesis of Ni (Hoba)<sub>2</sub>·2H<sub>2</sub>O at different Mole ratio of Precursor's

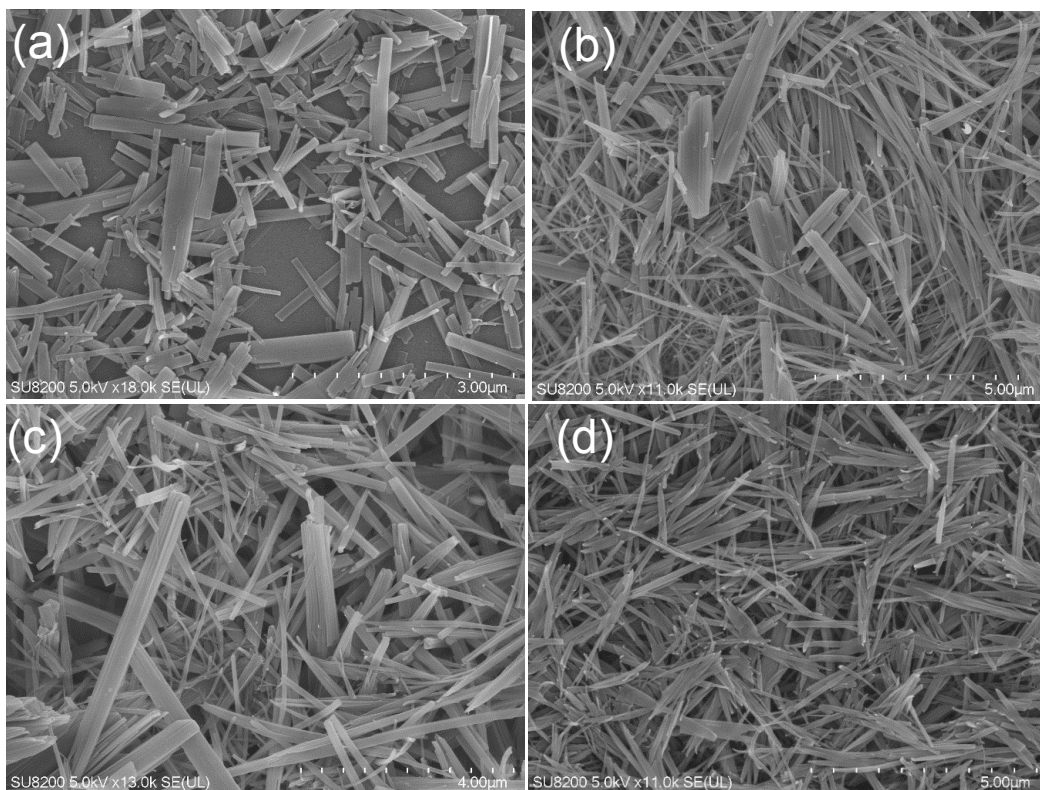

**Fig. S6:** SEM image shows Ni(Hoba)<sub>2</sub>·2H<sub>2</sub>O at a different Mole ratio of precursors. (a) 1:1, (b) 1:2, (c) 1:3, (d) 1:4 mole ratio.

Ni(NO<sub>3</sub>)<sub>2</sub>·6H<sub>2</sub>O and H<sub>2</sub>oba with different ratio of 1:1 or 1:2 or 1:3 or 1:4 respectively, were mixed in 5 mL of distilled water, 20µl of TEA were added into the solution to adjust the pH value to ~7.00. The solution was kept in a 20 mL Teflon-lined stainless-steel autoclave heated at 120 °C for 12h, followed by cooling to room temperature. Then washed with ethanol several times and collected the light green colored MOF with a 56 % yield.

### Synthesis of Ni (Hoba)<sub>2</sub>·2H<sub>2</sub>O at the variation of Time.

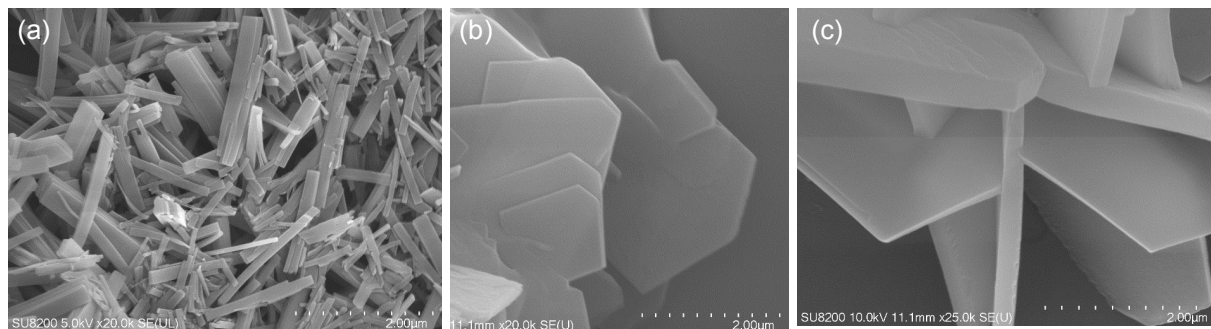

**Fig. S7:** SEM image shows Ni(Hoba)<sub>2</sub>·2H<sub>2</sub>O at different time variation. (a) 24h, (b) 36h, (c) 48h.

Ni(NO<sub>3</sub>)<sub>2</sub>·6H<sub>2</sub>O (0.4 mmol) and H<sub>2</sub>oba (0.8 mmol) were mixed in 5 mL of distilled water, 20µl of TEA were added into the solution to adjust the pH value to ~7.00. Then the solution was kept in a 20 mL Teflon-lined stainless-steel autoclave heated at 120°C for 24, 36, 48h, respectively, followed by cooling to room temperature. The products were centrifuged and washed with ethanol several times and finally dried at room temperature the light green colored MOF with 56 % yield. From this different time screening analysis, we have found 12 to 24h is the ideal time for this MOF nanosheet synthesis.

### Experimental Results

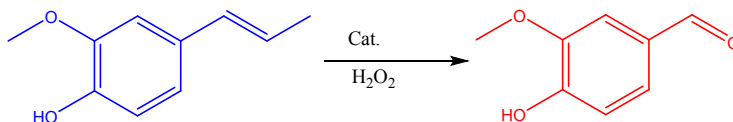

### Synthesis of Vanillin by various oxidants

**Table 1:** The synthesis of vanillin using various oxidant.

| No | Oxidant                       | conversion (%) |
|----|-------------------------------|----------------|
| 1  | Air                           | NR             |
| 2  | H <sub>2</sub> O <sub>2</sub> | 23             |
| 3  | TBHP                          | NR             |

**Reaction condition:** 0.5ml Isoeugenol, cat: Co/ Ni – Hoba, 20mg, oxidant 2ml, rt, 24h.

## Synthesis of Vanillin by various solvents

**Table 2:** The synthesis of vanillin using various solvents.

| No | Solvent      | Conversion (%) | Selectivity (%) |
|----|--------------|----------------|-----------------|
| 1  | Neat         | 1% ≤           | 98              |
| 2  | Acetonitrile | 23 %           | 92              |
| 3  | Methanol     | 17%            | 88              |
| 4  | DMF          | 18 %           | 87              |

**Reaction condition:** 0.5ml Isoeugenol, cat: Ni – Hoba, 20mg, H<sub>2</sub>O<sub>2</sub> - 2ml, rt, 24h.
